# Supplementary material for: β-Sitosterol Protects against Carbon Tetrachloride Hepatotoxicity but not Gentamicin Nephrotoxicity in Rats via the Induction of Mitochondrial Glutathione Redox Cycling
Source: PubMed Central journal article supplement (PMC6271253; doi:10.3390/molecules191117649), 2014-10-30

# Supplementary Materials

**Table S1.** Chemical characterization of phytosterols in HCF1 by HPLC-MS/MS.

| Peak no. | Retention Time (min) | [M+H] <sup>+</sup> | [M+Na] <sup>+</sup> | [M+K] <sup>+</sup> | MS/MS                                         | Identification | Quantitative Estimation (% Area) |
|----------|----------------------|--------------------|---------------------|--------------------|-----------------------------------------------|----------------|----------------------------------|
| 1        | 29.77                | 401                | 423                 | 439                | 383 [M+H-H <sub>2</sub> O] <sup>+</sup> ; 161 | CAMP           | 13.9                             |
| 2        | 32.94                | 415                | -                   | -                  | 397 [M+H-H <sub>2</sub> O] <sup>+</sup> ; 161 | BSS            | 2.7                              |
| 3        | 33.97                | 417                | 439                 | 455                | 399 [M+H-H <sub>2</sub> O] <sup>+</sup> ; 163 | SS             | 11.6                             |

The quantitative estimation of CAMP, BSS and SS were expressed in percent area with respect to the total chemical content of HCF1.

**Figure S1.** TIC chromatography of Herba Cistanches Fraction One (HCF1), a semi-purified fraction of Cistanches Herba by HPLC-MS/MS. The TIC chromatography of HCF1 was obtained as described in Materials and methods. Data were expressed as relative abundance of particular chemical constituents (1: campesterol (CAMP); 2: BSS and 3: sitostanol (SS)).

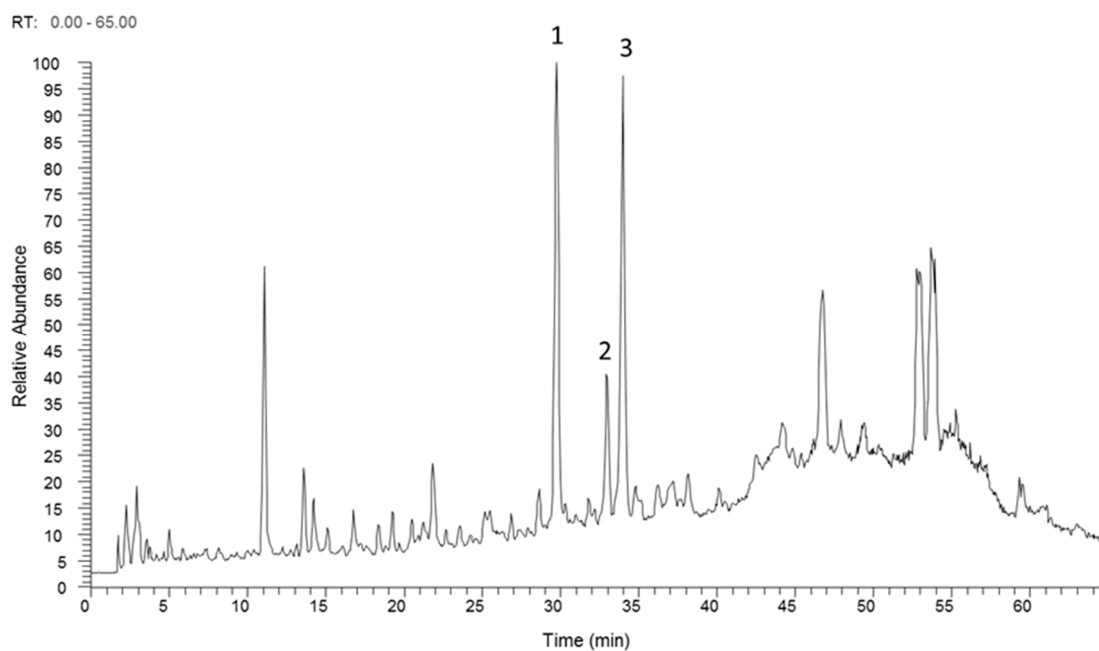

Supplement: molecules-19-17649-s001.pdf [file molecules-19-17649-s001.pdf]
